# Supplementary material for: Electron transport properties of PAl12-based cluster complexes
Source: Royal Society of Chemistry journal article supplement (doi:10.1039/d1na00355k), 2021-01-01
Supplement: d1na00355k1.pdf [file d1na00355k1.pdf]

## Electronic Supplementary Information

### **Electron Transport Properties of $\text{PAI}_{12}$ -Based Cluster Complexes**

John Shen<sup>1</sup>, Haiying He<sup>1\*</sup>, Turbasu Sengupta<sup>2</sup>, Dinesh Bista<sup>2</sup>, Arthur Reber<sup>2</sup>, Ravindra Pandey<sup>3</sup>,  
and Shiv N. Khanna<sup>2\*</sup>

<sup>1</sup>Department of Physics and Astronomy, Valparaiso University, Valparaiso, IN 46383, USA

<sup>2</sup>Department of Physics, Virginia Commonwealth University, Richmond, Virginia 23284, USA

<sup>3</sup>Department of Physics, Michigan Technological University, Houghton, Michigan 49931, USA

(July 27, 2021)

Corresponding Authors: haiying.he@valpo.edu, snkhanna@vcu.edu

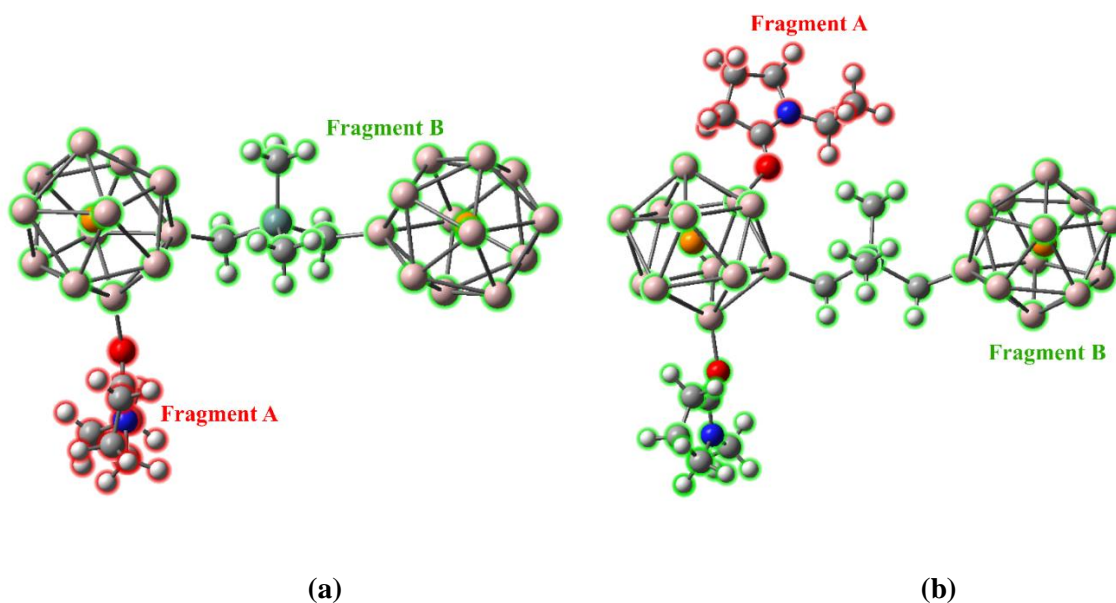

Figure S1. Test calculations of basis set superposition error (BSSE) for (a)  $(EP)_1PAI_{12}[Ge_B]PAI_{12}$  and (b)  $(EP)_2PAI_{12}[Ge_B]PAI_{12}$ .

**Note:** summary of BSSE results.

(a) Level of Theory: PBE/TZ2P+scalar-rel ZORA

BSSE (fragment A) = 0.0199 eV

BSSE (fragment B) = 0.0264 eV

Net Total BSSE for  $(EP)_1PAI_{12}Ge^2_BPAI_{12} = 0.0463$  eV (1.07 kcal/mol).

(b) Level of Theory: PBE/TZ2P+scalar-rel ZORA

BSSE (fragment A) = 0.0228 eV

BSSE (fragment B) = 0.0265 eV

Net Total BSSE for  $(EP)_2PAI_{12}Ge^2_BPAI_{12} = 0.0493$  eV (1.13 kcal/mol).

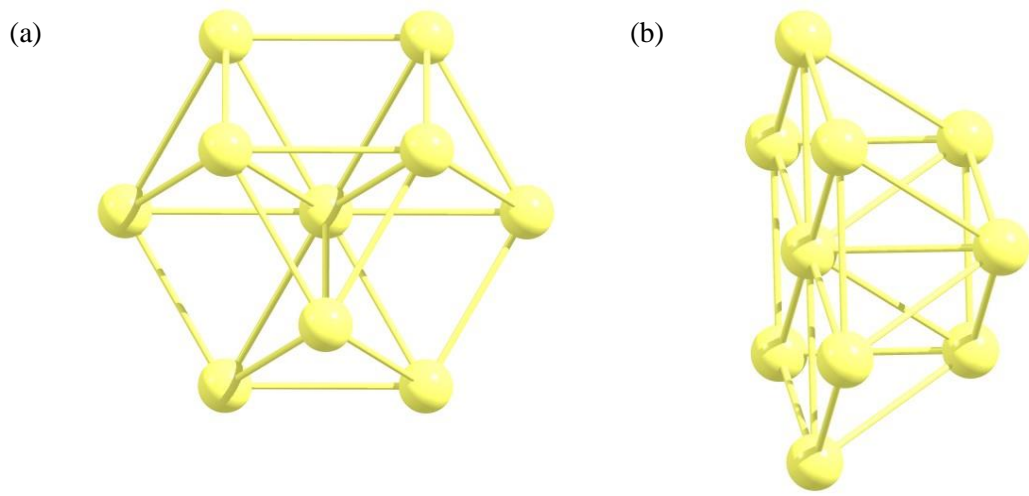

Figure S2. Structure model for the Au electrode in (a) top view, and (b) side view.

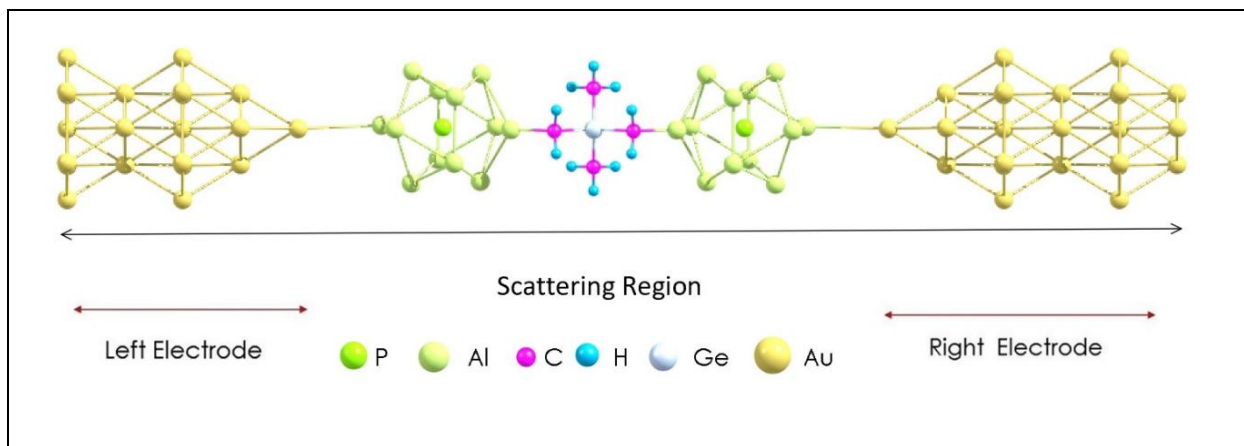

EP0: Al-Au distance: 3.50 Å

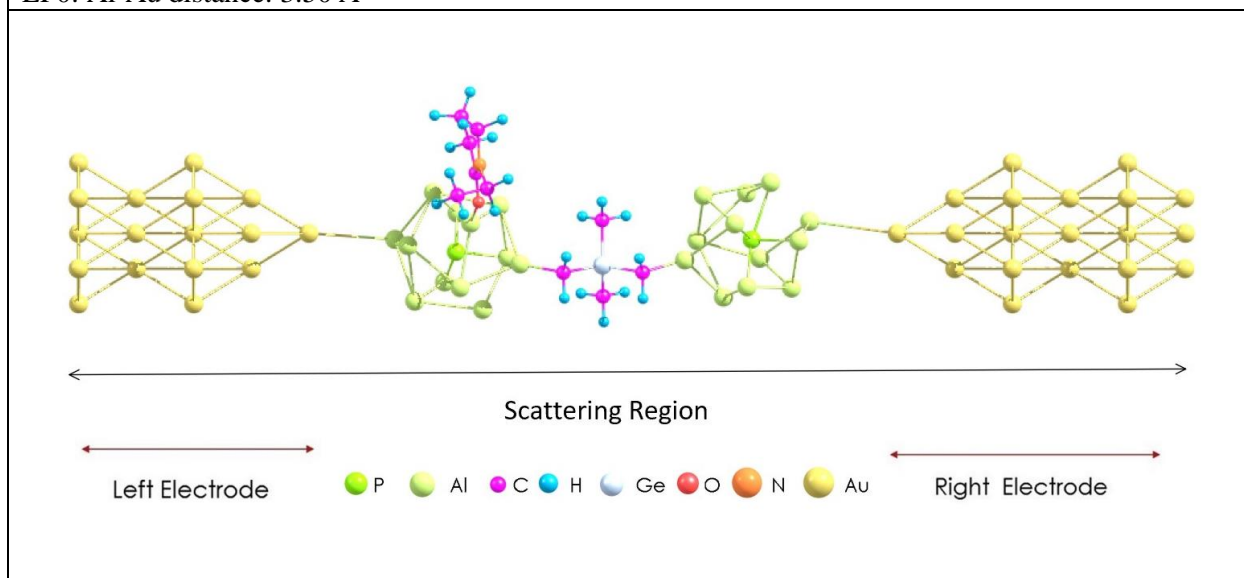

EP1: Al-Au distance: 3.92 Å

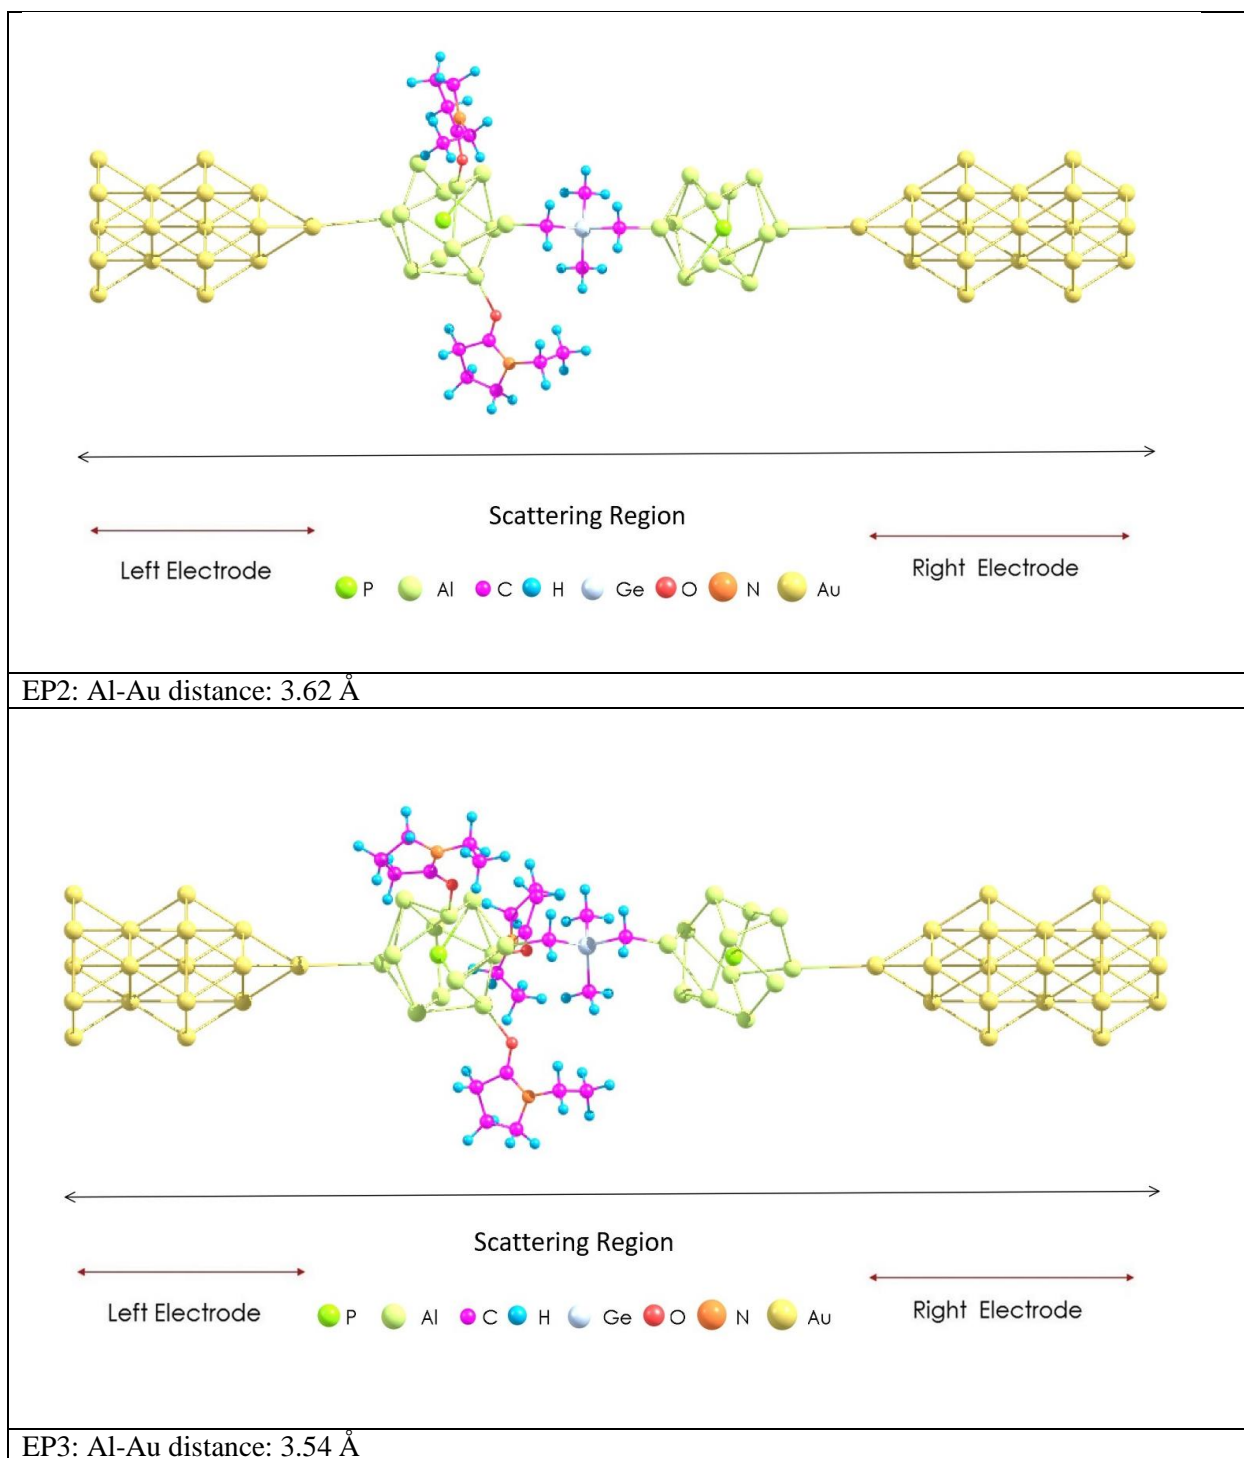

Figure S3. The device configuration consisting of the Au electrode and  $(EP)_nPA1_{12}[Ge_B]PA1_{12}$  ( $n = 0-3$ ) cluster complex with zero, one, two, and three ligands (labeled as EP0, EP1, EP2, and EP3). The shortest distance between Al and Au is also labeled.

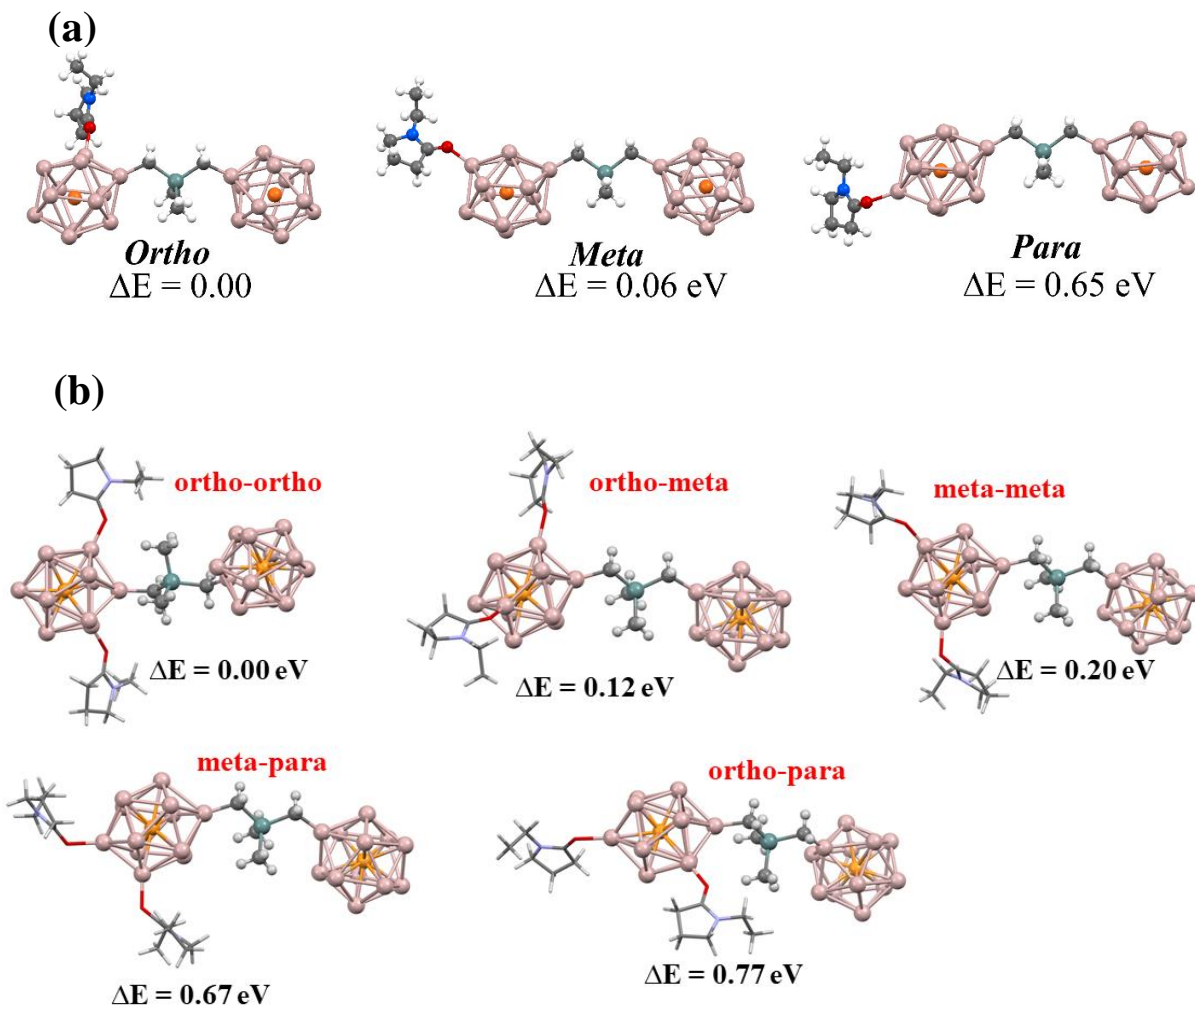

Figure S4. Various conformers of (a)  $(EP)_1PAI_{12}[Ge_B]PAI_{12}$  and (b)  $(EP)_2PAI_{12}[Ge_B]PAI_{12}$ . Relative energies  $\Delta E$  (in eV) are listed for all configurations. The lowest energy configurations are chosen and used for electron transport calculations.

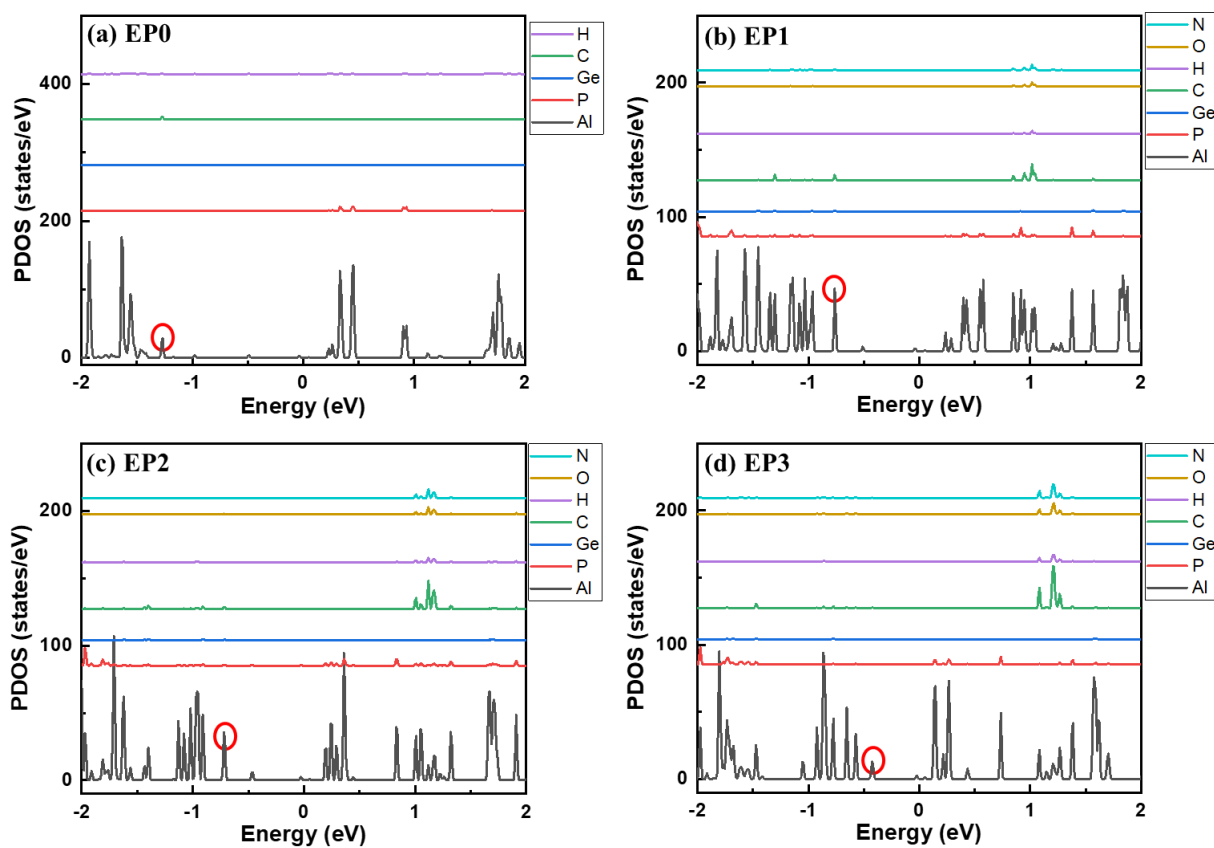

Figure S5. Projected density of states (PDOS) of the  $(EP)_n\text{PA}_{12}[\text{Ge}_B]\text{PA}_{12}$  ( $n = 0-3$ ) cluster complexes in contact with Au electrodes with zero (EP0), one (EP1), two (EP2), and three (EP3) ligands. The zero of the energy is aligned to the Fermi energy. The peak corresponding to the first significant transmission orbital below the Fermi level is labeled by a red circle. The major contribution to these peaks is from the cluster atom, Al.

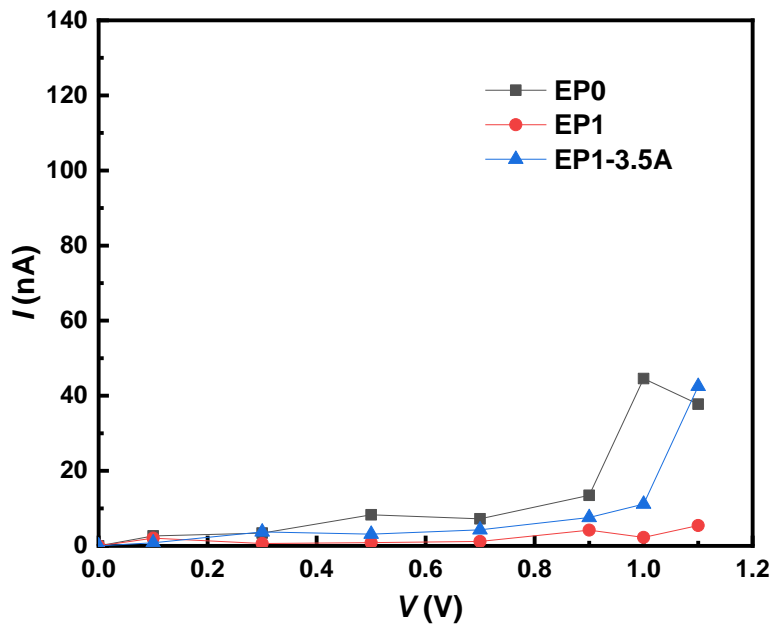

Figure S6. The current-voltage characteristics of the  $(EP)_nPAI_{12}[Ge_B]PAI_{12}$  cluster complexes: EP0 with an Al-Au distance of 3.5 Å, EP1 with an Al-Au distance of 3.9 Å, and EP1-3.5A with an Al-Au distance of 3.5 Å.



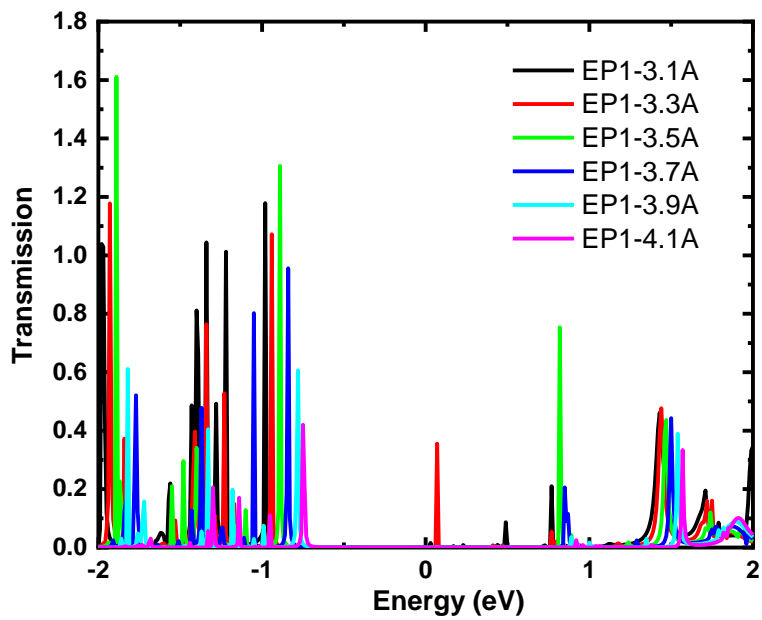

(a)

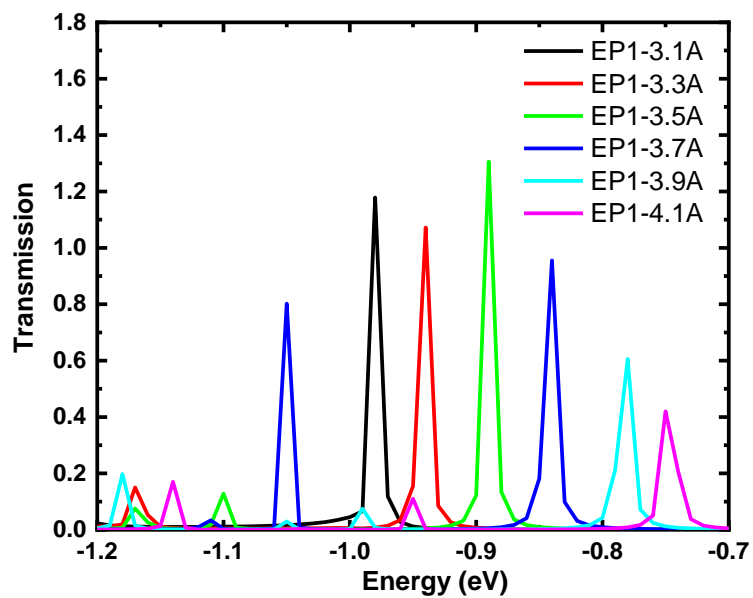

(b)

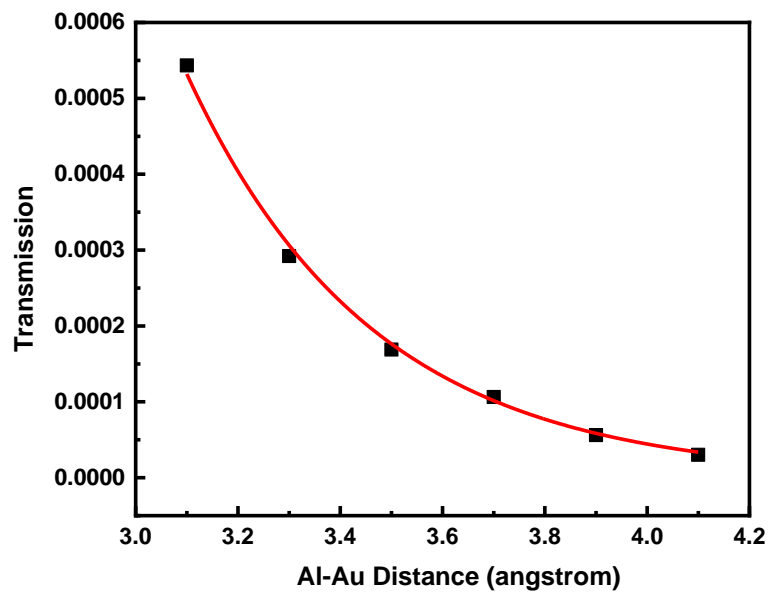

(c)

Figure S7. Transmission functions of the  $(EP)_1Al_{12}P[Ge_B]Al_{12}P$  cluster complex EP1 at 0 V for different Al (cluster)-Au (electrode) distances (a) within the energy range of  $-2.0 \sim 2.0$  eV; (b) zoomed into the range of  $-1.2 \sim -0.7$  eV to see the variation of the first significant transmission peak below the Fermi level. The zero of the energy is aligned to the Fermi energy. The transmission value at 0 eV is plotted as a function of the Al (cluster)-Au (electrode) distance in (c), which follows an exponential decay (the red line).

Table S1. Comparison of the calculated HOMO–LUMO gap of the three optimized cluster complexes (EP1, EP2, and EP3) from PBE and B3LYP functionals using the same basis set (TZ2P).

| PBE<br>(As reported in the paper) |       |       |       |
|-----------------------------------|-------|-------|-------|
| System                            | EP1   | EP2   | EP3   |
| HOMO-LUMO Gap (eV)                | 1.14  | 0.60  | 0.21  |
| HOMO (eV)                         | -4.18 | -3.62 | -3.26 |
| LUMO (eV)                         | -3.04 | -3.02 | -3.05 |
| B3LYP<br>(20% HF exchange)        |       |       |       |
| System                            | EP1   | EP2   | EP3   |
| HOMO-LUMO Gap (eV)                | 2.00  | 1.40  | 0.96  |
| HOMO (eV)                         | -4.39 | -3.77 | -3.38 |
| LUMO (eV)                         | -2.39 | -2.37 | -2.42 |

**Note:** As seen from the table, for all three systems, the B3LYP calculated HOMO–LUMO gaps are 0.75-0.86 eV higher than GGA-PBE. Although the magnitude of the gap has changed, the relative trend remained the same. As we proceed from EP1 to EP3, the HOMO–LUMO gap is gradually reducing, as reported in the paper. Furthermore, the energies of the HOMO and LUMO levels are also altering similarly.

**Cartesian coordinates of optimized ground state structures of (EP)<sub>n</sub>PAI<sub>12</sub>[Ge<sub>B</sub>]PAI<sub>12</sub> (n= 0-3)**

**PAI<sub>12</sub>[Ge<sub>B</sub>]PAI<sub>12</sub>**

41

XYZ

|    |           |           |           |    |           |           |           |
|----|-----------|-----------|-----------|----|-----------|-----------|-----------|
| P  | -0.043747 | 0.292629  | -6.228118 | Al | -0.074207 | 1.182806  | 8.673498  |
| Al | -2.201637 | 0.199426  | -4.675824 | Al | -1.544797 | 2.164711  | 6.385833  |
| Al | -1.581587 | 2.377416  | -6.342846 | Al | 1.23538   | 2.374463  | 6.388298  |
| Al | 0.065293  | -1.01401  | -3.476046 | H  | -2.517518 | -0.427149 | -0.034114 |
| Al | -1.231905 | -2.048675 | -5.789868 | C  | -1.677058 | 0.277377  | -0.021449 |
| Al | -0.122933 | 1.776992  | -4.026275 | H  | -0.662609 | -2.670613 | 1.504259  |
| Al | -2.293853 | -0.066465 | -7.469431 | H  | -1.741922 | 0.89212   | 0.884915  |
| Al | 1.199779  | 2.560266  | -6.370641 | H  | -1.744084 | 0.927205  | -0.902755 |
| Al | -0.148297 | 1.462896  | -8.681599 | H  | -0.653273 | -2.63966  | -1.631371 |
| Al | 1.448348  | -1.871577 | -5.818045 | C  | 0.168118  | -1.952085 | 1.593069  |
| Al | 2.135598  | 0.486291  | -4.717151 | Ge | 0.070661  | -0.746282 | -0.042486 |
| Al | 0.0484    | -1.38302  | -8.204109 | C  | 0.164765  | -1.905512 | -1.711294 |
| Al | 2.204139  | 0.232578  | -7.512329 | H  | 1.102972  | -2.528913 | 1.505163  |
| Al | -1.159481 | -2.23582  | 5.672729  | H  | 1.109065  | -2.470431 | -1.649614 |
| Al | 1.518059  | -2.031043 | 5.672877  | C  | 1.629167  | 0.546922  | -0.025941 |
| Al | 0.100445  | -1.102459 | 3.379542  | H  | 1.596287  | 1.163959  | 0.880612  |
| Al | 0.142279  | -1.642087 | 8.090886  | H  | 1.588455  | 1.198807  | -0.907308 |
| Al | -2.163178 | 0.040659  | 4.649532  | H  | 2.572789  | -0.011979 | -0.040915 |
| Al | 2.170462  | 0.370353  | 4.650553  |    |           |           |           |
| P  | 0.010186  | 0.101407  | 6.178327  |    |           |           |           |
| Al | -2.219948 | -0.322926 | 7.432874  |    |           |           |           |
| Al | 2.275007  | 0.016595  | 7.432374  |    |           |           |           |
| Al | -0.10827  | 1.664664  | 4.032379  |    |           |           |           |

**(EP)<sub>1</sub>PAI<sub>12</sub>[Ge<sub>B</sub>]PAI<sub>12</sub>**

60

XYZ

|    |          |          |          |    |          |          |          |
|----|----------|----------|----------|----|----------|----------|----------|
| P  | 0.5245   | 1.538    | -5.37507 | C  | -0.78365 | 0.5638   | 0.67669  |
| Al | -1.35569 | 1.15659  | -3.54    | H  | 0.8126   | -2.37033 | 1.9205   |
| Al | -1.04413 | 3.53517  | -5.03134 | H  | -0.96325 | 1.08951  | 1.62212  |
| Al | 1.02013  | -0.08812 | -2.80903 | H  | -0.94091 | 1.25672  | -0.15923 |
| Al | -0.67027 | -1.01125 | -4.96505 | H  | 0.75402  | -2.01867 | -1.11753 |
| Al | 0.76167  | 2.7451   | -3.06002 | C  | 1.38247  | -1.45997 | 2.16823  |
| Al | -1.88926 | 1.17961  | -6.24448 | Ge | 1.11109  | -0.15821 | 0.61778  |
| Al | 1.7577   | 3.86859  | -5.51717 | C  | 1.39448  | -1.1216  | -1.14703 |
| Al | 0.02624  | 2.84941  | -7.64387 | H  | 2.44862  | -1.73754 | 2.16751  |
| Al | 1.9553   | -0.70622 | -5.34941 | H  | 2.4389   | -1.47239 | -1.16    |
| Al | 2.86852  | 1.54936  | -4.20737 | C  | 2.42262  | 1.37082  | 0.8183   |
| Al | 0.26952  | -0.03943 | -7.42243 | H  | 2.24593  | 1.89427  | 1.76664  |
| Al | 2.52697  | 1.52321  | -6.97658 | H  | 2.30519  | 2.07827  | -0.01106 |
| Al | -0.61908 | -2.4123  | 5.86302  | H  | 3.44879  | 0.98231  | 0.81144  |
| Al | 1.92793  | -1.79931 | 6.44694  | H  | -1.33147 | -5.67296 | -6.79346 |
| Al | 0.8522   | -0.85098 | 3.97406  | C  | -1.76052 | -6.32204 | -6.01905 |
| Al | 0.05502  | -1.89895 | 8.54447  | H  | -2.6652  | -6.79748 | -6.42012 |
| Al | -1.78162 | -0.22015 | 4.82853  | H  | -1.0351  | -7.11584 | -5.79827 |
| Al | 2.33447  | 0.7723   | 5.77436  | H  | -5.11666 | -3.33001 | -6.61224 |
| P  | 0.       | 0.       | 6.78593  | H  | -4.67114 | -5.50383 | -5.74906 |
| Al | -2.32142 | -0.89626 | 7.49955  | C  | -2.04989 | -5.52742 | -4.74763 |
| Al | 1.95464  | 0.13223  | 8.4827   | H  | -3.77546 | -1.49074 | -5.80449 |
| Al | 0.03718  | 1.75867  | 4.7897   | O  | -1.51141 | -2.7398  | -4.82426 |
| Al | -0.75948 | 0.77495  | 9.2815   | N  | -3.01543 | -4.45098 | -4.95563 |
| Al | -1.90033 | 1.76694  | 6.81351  | C  | -2.70053 | -3.15151 | -4.95425 |
| Al | 0.74495  | 2.39983  | 7.42336  | C  | -5.01641 | -3.32913 | -5.5192  |
| H  | -1.49847 | -0.2648  | 0.59047  | C  | -4.46163 | -4.6868  | -5.04675 |

H -1.13352 -5.05801 -4.36883

C -3.94363 -2.31339 -5.09474

H -2.44741 -6.18286 -3.95774

H -6.00184 -3.11876 -5.09105

H -4.84588 -4.98071 -4.05538

H -4.14826 -1.84365 -4.11893

Al 0.8704 -1.35096 -4.87768

Al 2.0666 0.79328 -3.80154

Al -0.56466 -0.6745 -7.14333

Al 1.83783 0.61131 -6.56664

Al -1.16552 -2.31516 6.63808

Al 1.50198 -2.07253 6.51937

Al -0.03801 -1.01819 4.35044

Al 0.24944 -1.85725 9.02841

Al -2.24441 0.00403 5.81459

Al 2.06959 0.39987 5.62413

P 0.000 0.000 7.24151

Al -2.15907 -0.53899 8.57023

Al 2.32573 -0.12845 8.37057

Al -0.24981 1.69629 5.20578

Al 0.02739 0.92004 9.80139

Al -1.5711 2.02064 7.65433

Al 1.20044 2.27517 7.53596

H -2.56265 0.22434 1.11683

C -1.63656 0.81249 1.09703

H -0.97941 -2.35365 2.39043

H -1.57397 1.40681 2.01783

H -1.66221 1.4854 0.23124

H -1.00892 -2.10985 -0.72765

C -0.07152 -1.74165 2.51595

**(EP)<sub>2</sub>PAI<sub>12</sub>[Ge<sub>B</sub>]PAI<sub>12</sub>**

79

XYZ

P -0.30793 1.01073 -5.2215

Al -2.29994 1.04636 -3.52505

Al -1.52272 3.23899 -5.09541

Al -0.17476 -0.44869 -2.51503

Al -1.80486 -1.28046 -4.73506

Al 0.02227 2.29116 -2.96004

Al -2.70688 0.95945 -6.32794

Al 1.30579 3.10304 -5.34755

Al -0.37821 2.20692 -7.56603

|                              |                                                                         |
|------------------------------|-------------------------------------------------------------------------|
| Ge -0.04349 -0.42982 0.9459  | H 5.57079 1.56989 1.16347                                               |
| C -0.11602 -1.46557 -0.78963 | C 5.57329 2.05869 0.18059                                               |
| H 0.78891 -2.41573 2.37607   | H 4.60277 2.55234 0.04465                                               |
| H 0.75898 -2.13604 -0.79395  | H 6.36183 2.82329 0.18766                                               |
| C 1.66918 0.65639 1.03634    | C 5.80388 1.01462 -0.90977                                              |
| H 1.68541 1.27095 1.94515    | H 4.99559 0.27217 -0.90624                                              |
| H 1.73216 1.3066 0.15407     | H 6.75602 0.48481 -0.75154                                              |
| H 2.53155 -0.02234 1.04567   | N 5.83383 1.59247 -2.25086                                              |
| H -2.97921 -5.86457 -6.30785 | O 3.7859 0.8231 -2.90107                                                |
| C -3.63623 -6.39031 -5.60335 | H 7.3739 3.03039 -2.05125                                               |
| H -4.53634 -6.71741 -6.14192 | C 4.85393 1.45226 -3.1509                                               |
| H -3.11263 -7.28801 -5.24953 | C 7.0003 2.30481 -2.78498                                               |
| H -6.33452 -2.93661 -6.78616 | H 6.14199 3.99579 -3.84573                                              |
| H -6.40303 -5.08676 -5.76509 | H 7.80801 1.58165 -2.99125                                              |
| C -3.9791 -5.49367 -4.41504  | C 6.45853 2.96822 -4.06592                                              |
| H -4.78748 -1.30396 -5.89583 | C 5.23514 2.11876 -4.44495                                              |
| O -2.93083 -2.85835 -4.5637  | H 4.38152 2.68402 -4.84865                                              |
| N -4.69804 -4.28329 -4.80331 | H 7.2149 3.01168 -4.85647                                               |
| C -4.14899 -3.06156 -4.82833 | H 5.45973 1.33052 -5.18219                                              |
| C -6.37072 -2.87336 -5.69047 |                                                                         |
| C -6.13787 -4.26919 -5.08032 |                                                                         |
| H -3.06565 -5.16925 -3.90218 |                                                                         |
| C -5.1908 -2.03411 -5.17762  | <b>(EP)<sub>3</sub>PAI<sub>12</sub>[Ge<sub>B</sub>]PAI<sub>12</sub></b> |
| H -4.60445 -6.0327 -3.68648  | 98                                                                      |
| H -7.34616 -2.46208 -5.40992 | XYZ                                                                     |
| H -6.69306 -4.4191 -4.13911  | P -0.06833 0.26195 -5.08497                                             |
| H -5.42549 -1.46386 -4.26422 | Al -2.26331 0.488 -3.68549                                              |

|                               |                              |
|-------------------------------|------------------------------|
| Al -1.18557 2.53616 -5.19953  | H -1.80998 1.246 0.25168     |
| Al -0.42983 -0.99608 -2.30281 | H -1.73913 -2.36885 -0.53968 |
| Al -1.68511 -1.89273 -4.731   | C -0.84736 -2.02128 2.79458  |
| Al -0.06318 1.74914 -2.75644  | Ge -0.55341 -0.84493 1.14113 |
| Al -2.25844 0.24573 -6.51746  | C -0.72664 -1.93293 -0.54771 |
| Al 1.61152 2.32479 -4.97166   | H -0.1922 -2.90019 2.67134   |
| Al 0.2955 1.37862 -7.41479    | H -0.0165 -2.77145 -0.45828  |
| Al 0.96097 -2.04591 -4.39782  | C 1.305 -0.02893 1.25699     |
| Al 1.99045 0.13644 -3.21872   | H 1.35238 0.68557 2.09029    |
| Al -0.02936 -1.51012 -7.00457 | H 1.5341 0.49226 0.31832     |
| Al 2.26598 -0.20535 -5.98005  | H 2.04674 -0.82008 1.42079   |
| Al -0.73946 -2.54131 7.09549  | H -2.79027 -6.78815 -3.45612 |
| Al 1.6937 -1.75679 6.2844     | C -3.88284 -6.89621 -3.4388  |
| Al -0.51874 -1.21631 4.56427  | H -4.16277 -7.73543 -4.08987 |
| Al 1.0864 -1.63457 9.0265     | H -4.18449 -7.15232 -2.41492 |
| Al -2.46951 -0.56964 6.54001  | H -3.1549 -5.91969 -7.82044  |
| Al 1.47346 0.70841 5.23702    | H -4.75256 -6.89282 -6.34866 |
| P 0.000 0.000 7.3342          | C -4.55943 -5.59433 -3.86321 |
| Al 2.50302 0.44405 7.83728    | H -2.3417 -3.69832 -7.3106   |
| Al -1.10373 1.44138 5.39342   | O -2.88412 -3.43242 -4.61213 |
| Al 0.45875 1.09065 9.78621    | N -4.21138 -5.18614 -5.22002 |
| Al -1.82226 1.67707 8.09546   | C -3.4354 -4.12984 -5.50747  |
| Al 0.7072 2.49315 7.27032     | C -3.96362 -5.22162 -7.56752 |
| H -2.92905 0.24698 1.22422    | C -4.80496 -5.7978 -6.41332  |
| C -1.91372 0.65849 1.17133    | H -4.25868 -4.77147 -3.20233 |
| H -1.88567 -2.38596 2.74163   | C -3.37196 -3.92313 -6.99606 |
| H -1.74206 1.30563 2.0426     | H -5.65566 -5.68967 -3.81048 |



|                              |                              |
|------------------------------|------------------------------|
| H -4.56249 -5.06025 -8.46987 | C -1.67228 6.34252 -1.94916  |
| H -5.86876 -5.51054 -6.48131 | N -0.58694 5.35728 -1.92191  |
| H -3.96116 -3.02308 -7.2371  | C -0.96708 4.17812 -1.41416  |
| H 5.50065 -0.04703 2.04992   | H -3.74572 5.97602 -1.32233  |
| C 5.67172 0.49909 1.11305    | C -2.41044 4.24633 -0.98784  |
| H 4.93104 1.30759 1.05098    | O -0.23516 3.14808 -1.36923  |
| H 6.6751 0.94391 1.16321     | C -2.72583 5.74848 -0.99582  |
| C 5.5279 -0.45502 -0.06999   | H -1.30596 7.32778 -1.62947  |
| H 4.51615 -0.87854 -0.10053  | C 1.65545 6.41346 -1.692     |
| H 6.24417 -1.28729 0.01278   | H 2.597 6.57737 -2.23362     |
| N 5.74373 0.19287 -1.35964   | H -2.564 3.74627 -0.02396    |
| O 3.57262 0.07121 -2.05896   | H 1.24181 7.39868 -1.43422   |
| H 7.64953 1.08095 -1.10517   | H -2.59186 6.16555 0.01158   |
| C 4.77704 0.37756 -2.27417   | H 1.8836 5.87774 -0.76216    |
| C 7.07673 0.53375 -1.8654    | Al -1.58198 -0.86896 9.19234 |
| H 6.78022 2.44356 -2.85717   |                              |
| H 7.62604 -0.3941 -2.10352   |                              |
| C 6.77784 1.37728 -3.11879   |                              |
| C 5.36441 0.94459 -3.53763   |                              |
| H 4.72622 1.74434 -3.93935   |                              |
| H 7.52589 1.22372 -3.90471   |                              |
| H 5.35563 0.14543 -4.29818   |                              |
| H -2.04562 6.43364 -2.98285  |                              |
| H 0.50091 6.11653 -3.51719   |                              |
| H -2.98236 3.67693 -1.74285  |                              |
| C 0.70165 5.60205 -2.56609   |                              |
| H 1.13126 4.62275 -2.82135   |                              |
